# Supplementary material for: Room temperature esterification of high-free fatty acid feedstock into biodiesel
Source: Royal Society of Chemistry journal article supplement (doi:10.1039/d3ra06912e), 2023-01-01
Supplement: d3ra06912e1.pdf [file d3ra06912e1.pdf]

## Room temperature esterification of high-free fatty acid feedstock into biodiesel

Minto Supeno\*, John P. Sihotang, Yolinda V. Panjaitan, Dian, S.Y. Damanik, Juliati Br. Tarigan and Eko K. Sitepu  
Department of Chemistry, Universitas Sumatera Utara, Medan 20155, Indonesia

\*Correspondence author: [minto@usu.ac.id](mailto:minto@usu.ac.id)

**Table 1.** ANOVA and Tukey post hoc test for biodiesel conversion of the homogenizer-intensified the esterification of oleic acid to biodiesel.

### Effect of ratio molar

| Effect                    | Univariate Tests of Significance for Conversion (Spreadsheet2)<br>Sigma-restricted parameterization<br>Effective hypothesis decomposition |                  |          |          |          |
|---------------------------|-------------------------------------------------------------------------------------------------------------------------------------------|------------------|----------|----------|----------|
|                           | SS                                                                                                                                        | Degr. of Freedom | MS       | F        | p        |
| Intercept                 | 197705.2                                                                                                                                  | 1                | 197705.2 | 234963.7 | 0.000000 |
| Ratio Molar               | 2435.5                                                                                                                                    | 2                | 1217.8   | 1447.3   | 0.000000 |
| Reaction Time             | 5068.8                                                                                                                                    | 6                | 844.8    | 1004.0   | 0.000000 |
| Ratio Molar*Reaction Time | 115.3                                                                                                                                     | 12               | 9.6      | 11.4     | 0.000001 |
| Error                     | 17.7                                                                                                                                      | 21               | 0.8      |          |          |

| Tukey HSD test: variable Conversion (Spreadsheet2) |             |               |          |          |          |          |          |          |          |          |          |          |          |          |          |          |          |          |          |          |          |          |          |          |          |
|----------------------------------------------------|-------------|---------------|----------|----------|----------|----------|----------|----------|----------|----------|----------|----------|----------|----------|----------|----------|----------|----------|----------|----------|----------|----------|----------|----------|----------|
| Approximate Probabilities for Post Hoc Tests       |             |               |          |          |          |          |          |          |          |          |          |          |          |          |          |          |          |          |          |          |          |          |          |          |          |
| Error: Between MS = .84143, df = 21.000            |             |               |          |          |          |          |          |          |          |          |          |          |          |          |          |          |          |          |          |          |          |          |          |          |          |
| Cell No.                                           | Ratio Molar | Reaction Time | {1}      | {2}      | {3}      | {4}      | {5}      | {6}      | {7}      | {8}      | {9}      | {10}     | {11}     | {12}     | {13}     | {14}     | {15}     | {16}     | {17}     | {18}     | {19}     | {20}     | {21}     |          |          |
| 1                                                  | 1:6         | 5             |          | 0.000190 | 0.000190 | 0.000190 | 0.000190 | 0.000190 | 0.000190 | 0.000190 | 0.000190 | 0.000190 | 0.000190 | 0.000190 | 0.000190 | 0.000190 | 0.000190 | 0.000190 | 0.000190 | 0.000190 | 0.000190 | 0.000190 | 0.000190 |          |          |
| 2                                                  | 1:6         | 15            | 0.000190 |          | 0.000198 | 0.000190 | 0.000190 | 0.000190 | 0.000190 | 0.000190 | 0.000190 | 0.000190 | 0.000190 | 0.000190 | 0.000190 | 0.000190 | 0.000190 | 0.000190 | 0.000190 | 0.000190 | 0.000190 | 0.000190 | 0.000190 | 0.000190 |          |
| 3                                                  | 1:6         | 30            | 0.000190 | 0.000198 |          | 0.000194 | 0.000190 | 0.000190 | 0.000190 | 0.000190 | 1.000000 | 0.000190 | 0.000190 | 0.000190 | 0.000190 | 0.000190 | 0.000190 | 0.000190 | 0.000190 | 0.000190 | 0.000190 | 0.000190 | 0.000190 | 0.000190 |          |
| 4                                                  | 1:6         | 45            | 0.000190 | 0.000190 | 0.000194 |          | 0.385158 | 0.016731 | 0.033132 | 0.000190 | 0.000197 | 0.001009 | 0.000190 | 0.000190 | 0.000190 | 0.000190 | 0.000190 | 0.000190 | 0.000190 | 0.000190 | 0.000190 | 0.000190 | 0.000190 | 0.000190 |          |
| 5                                                  | 1:6         | 60            | 0.000190 | 0.000190 | 0.000190 | 0.385158 |          | 0.968350 | 0.968350 | 0.996441 | 0.000190 | 0.000190 | 0.303706 | 0.000195 | 0.000190 | 0.000190 | 0.000190 | 0.000190 | 0.000214 | 1.000000 | 0.000190 | 0.000190 | 0.000190 | 0.000190 |          |
| 6                                                  | 1:6         | 75            | 0.000190 | 0.000190 | 0.000190 | 0.016731 | 0.968350 |          | 1.000000 | 0.000190 | 0.000190 | 0.996441 | 0.000529 | 0.000190 | 0.000190 | 0.000190 | 0.000190 | 0.000191 | 0.896965 | 0.000190 | 0.000190 | 0.000190 | 0.000190 | 0.000190 |          |
| 7                                                  | 1:6         | 90            | 0.000190 | 0.000190 | 0.000190 | 0.033132 | 0.996441 | 1.000000 |          | 0.000190 | 0.000190 | 0.968350 | 0.000349 | 0.000190 | 0.000190 | 0.000190 | 0.000191 | 0.976469 | 0.000190 | 0.000190 | 0.000190 | 0.000190 | 0.000190 | 0.000190 |          |
| 8                                                  | 1:9         | 5             | 0.000190 | 0.001907 | 0.000190 | 0.000190 | 0.000190 | 0.000190 | 0.000190 | 0.000190 |          | 0.000190 | 0.000190 | 0.000190 | 0.000190 | 0.000190 | 0.000190 | 0.000190 | 0.000190 | 0.000190 | 0.000190 | 0.000190 | 0.000190 | 0.000190 |          |
| 9                                                  | 1:9         | 15            | 0.000190 | 0.000195 | 1.000000 | 0.000197 | 0.000190 | 0.000190 | 0.000190 | 0.000190 | 0.000190 |          | 0.000190 | 0.000190 | 0.000190 | 0.000190 | 0.000190 | 0.000190 | 0.000190 | 0.000190 | 0.000190 | 0.000190 | 0.000190 | 0.000190 |          |
| 10                                                 | 1:9         | 30            | 0.000190 | 0.000190 | 0.000190 | 0.001009 | 0.303706 | 0.996441 | 0.968350 | 0.000190 | 0.000190 |          | 0.007445 | 0.000197 | 0.000190 | 0.000190 | 0.000190 | 0.000190 | 0.195468 | 0.000191 | 0.000190 | 0.000190 | 0.000190 | 0.000190 |          |
| 11                                                 | 1:9         | 45            | 0.000190 | 0.000190 | 0.000190 | 0.000190 | 0.000195 | 0.000529 | 0.000349 | 0.000190 | 0.000190 | 0.007445 |          | 0.356697 | 0.003325 | 0.029601 | 0.000190 | 0.000193 | 0.108654 | 0.000489 | 0.000190 | 0.000190 | 0.000190 | 0.000190 |          |
| 12                                                 | 1:9         | 60            | 0.000190 | 0.000190 | 0.000190 | 0.000190 | 0.000190 | 0.000190 | 0.000190 | 0.000190 | 0.000190 | 0.000197 | 0.356697 |          | 0.676935 | 0.996441 | 0.000190 | 0.000190 | 1.000000 | 0.161766 | 0.000237 | 0.000190 | 0.000190 | 0.000197 |          |
| 13                                                 | 1:9         | 75            | 0.000190 | 0.000190 | 0.000190 | 0.000190 | 0.000190 | 0.000190 | 0.000190 | 0.000190 | 0.000190 | 0.000190 | 0.003325 | 0.676935 |          | 0.999898 | 0.000190 | 0.000190 | 0.968350 | 0.999898 | 0.011834 | 0.000202 | 0.002373 | 0.002373 |          |
| 14                                                 | 1:9         | 90            | 0.000190 | 0.000190 | 0.000190 | 0.000190 | 0.000190 | 0.000190 | 0.000190 | 0.000190 | 0.000190 | 0.000190 | 0.029601 | 0.996441 | 0.999898 |          | 0.000190 | 0.000190 | 1.000000 | 0.852747 | 0.001374 | 0.000191 | 0.000395 | 0.000395 |          |
| 15                                                 | 1:12        | 5             | 0.000190 | 0.000190 | 0.132935 | 0.018767 | 0.000214 | 0.000191 | 0.000191 | 0.000190 | 0.177971 | 0.000190 | 0.000190 | 0.000190 | 0.000190 | 0.000190 | 0.000190 | 0.000190 | 0.000237 | 0.000190 | 0.000190 | 0.000190 | 0.000190 | 0.000190 | 0.000190 |
| 16                                                 | 1:12        | 15            | 0.000190 | 0.000190 | 0.000190 | 0.543286 | 1.000000 | 0.896965 | 0.976469 | 0.000190 | 0.000190 | 0.195468 | 0.000193 | 0.000190 | 0.000190 | 0.000190 | 0.000190 | 0.000237 |          | 0.000190 | 0.000190 | 0.000190 | 0.000190 | 0.000190 | 0.000190 |
| 17                                                 | 1:12        | 30            | 0.000190 | 0.000190 | 0.000190 | 0.000190 | 0.000190 | 0.000190 | 0.000190 | 0.000190 | 0.000190 | 0.000191 | 0.108654 | 1.000000 | 0.968350 | 1.000000 | 0.000190 | 0.000190 |          | 0.477422 | 0.000454 | 0.000190 | 0.000231 | 0.000231 |          |
| 18                                                 | 1:12        | 45            | 0.000190 | 0.000190 | 0.000190 | 0.000190 | 0.000190 | 0.000190 | 0.000190 | 0.000190 | 0.000190 | 0.000190 | 0.000489 | 0.161766 | 0.999898 | 0.852747 | 0.000190 | 0.000190 | 0.477422 |          | 0.098040 | 0.000349 | 0.356697 | 0.999999 |          |
| 19                                                 | 1:12        | 60            | 0.000190 | 0.000190 | 0.000190 | 0.000190 | 0.000190 | 0.000190 | 0.000190 | 0.000190 | 0.000190 | 0.000190 | 0.000237 | 0.011834 | 0.001374 | 0.000190 | 0.000190 | 0.000190 | 0.000454 | 0.098040 |          | 0.356697 | 0.999999 | 0.999999 |          |
| 20                                                 | 1:12        | 75            | 0.000190 | 0.000190 | 0.000190 | 0.000190 | 0.000190 | 0.000190 | 0.000190 | 0.000190 | 0.000190 | 0.000190 | 0.000190 | 0.000202 | 0.000191 | 0.000190 | 0.000190 | 0.000190 | 0.000190 | 0.000349 | 0.356697 |          | 0.800270 | 0.800270 |          |
| 21                                                 | 1:12        | 90            | 0.000190 | 0.000190 | 0.000190 | 0.000190 | 0.000190 | 0.000190 | 0.000190 | 0.000190 | 0.000190 | 0.000190 | 0.000190 | 0.000197 | 0.002373 | 0.000395 | 0.000190 | 0.000190 | 0.000231 | 0.021045 | 0.999999 | 0.800270 |          | 0.800270 |          |

### Effect of catalyst concentration

| Effect                               | Univariate Tests of Significance for Conversion (%) (Spreadsheet8) |                  |          |          |          |
|--------------------------------------|--------------------------------------------------------------------|------------------|----------|----------|----------|
|                                      | SS                                                                 | Degr. of Freedom | MS       | F        | p        |
| Intercept                            | 444136.4                                                           | 1                | 444136.4 | 229986.3 | 0.000000 |
| Catalyst Concentration               | 6514.7                                                             | 4                | 1628.7   | 843.4    | 0.000000 |
| Reaction Time                        | 7427.8                                                             | 6                | 1238.0   | 641.1    | 0.000000 |
| Catalyst Concentration*Reaction Time | 334.8                                                              | 24               | 14.0     | 7.2      | 0.000000 |
| Error                                | 67.6                                                               | 35               | 1.9      |          |          |

| Tukey HSD test; variable Conversion (%) (Spreadsheet) |                        |               | Approximate Probabilities for Post Hoc Tests<br>Error: Between MS = 1.0311, df = 35.000 |         |         |         |         |         |         |         |         |         |         |         |         |         |         |         |         |         |         |         |         |         |         |         |         |         |         |         |         |         |         |         |         |         |         |         |
|-------------------------------------------------------|------------------------|---------------|-----------------------------------------------------------------------------------------|---------|---------|---------|---------|---------|---------|---------|---------|---------|---------|---------|---------|---------|---------|---------|---------|---------|---------|---------|---------|---------|---------|---------|---------|---------|---------|---------|---------|---------|---------|---------|---------|---------|---------|---------|
| Cell No.                                              | Catalyst Concentration | Reaction Time | (1)                                                                                     | (2)     | (3)     | (4)     | (5)     | (6)     | (7)     | (8)     | (9)     | (10)    | (11)    | (12)    | (13)    | (14)    | (15)    | (16)    | (17)    | (18)    | (19)    | (20)    | (21)    | (22)    | (23)    | (24)    | (25)    | (26)    | (27)    | (28)    | (29)    | (30)    | (31)    | (32)    | (33)    | (34)    | (35)    |         |
|                                                       |                        |               | 37.700                                                                                  | 50.800  | 62.900  | 70.150  | 74.250  | 76.400  | 75.350  | 60.800  | 69.300  | 78.300  | 80.800  | 85.350  | 87.150  | 87.400  | 51.600  | 68.100  | 77.100  | 81.900  | 84.500  | 86.850  | 85.300  | 71.000  | 80.350  | 88.100  | 91.600  | 94.350  | 95.400  | 96.550  | 73.350  | 85.950  | 91.350  | 94.700  | 96.850  | 97.950  | 98.300  |         |
| 1                                                     | 0.1                    | 5             | 0.00167                                                                                 | 0.00167 | 0.00167 | 0.00167 | 0.00167 | 0.00167 | 0.00167 | 0.00167 | 0.00167 | 0.00167 | 0.00167 | 0.00167 | 0.00167 | 0.00167 | 0.00167 | 0.00167 | 0.00167 | 0.00167 | 0.00167 | 0.00167 | 0.00167 | 0.00167 | 0.00167 | 0.00167 | 0.00167 | 0.00167 | 0.00167 | 0.00167 | 0.00167 | 0.00167 | 0.00167 | 0.00167 | 0.00167 | 0.00167 | 0.00167 | 0.00167 |

# Effect of rotational speed

| Effect                         | Univariate Tests of Significance for Conversion (%) (Spreadsheet11)<br>Sigma-restricted parameterization<br>Effective hypothesis decomposition |                  |          |          |         |
|--------------------------------|------------------------------------------------------------------------------------------------------------------------------------------------|------------------|----------|----------|---------|
|                                | SS                                                                                                                                             | Degr. of Freedom | MS       | F        | p       |
| Intercept                      | 336681.1                                                                                                                                       | 1                | 336681.1 | 217080.3 | 0.00000 |
| Rotational Speed               | 154.5                                                                                                                                          | 2                | 77.2     | 49.8     | 0.00000 |
| Reaction Time                  | 3724.3                                                                                                                                         | 6                | 620.7    | 400.2    | 0.00000 |
| Rotational Speed*Reaction Time | 63.7                                                                                                                                           | 12               | 5.3      | 3.4      | 0.00667 |
| Error                          | 32.6                                                                                                                                           | 21               | 1.6      |          |         |

| Tukey HSD test: variable Conversion (%) (Spreadsheet11) |                  |               |               |               |               |               |               |               |               |               |               |                |                |                |                |                |                |                |                |                |                |                |                |
|---------------------------------------------------------|------------------|---------------|---------------|---------------|---------------|---------------|---------------|---------------|---------------|---------------|---------------|----------------|----------------|----------------|----------------|----------------|----------------|----------------|----------------|----------------|----------------|----------------|----------------|
| Approximate Probabilities for Post Hoc Tests            |                  |               |               |               |               |               |               |               |               |               |               |                |                |                |                |                |                |                |                |                |                |                |                |
| Error: Between MS = 1.5510, df = 21.000                 |                  |               |               |               |               |               |               |               |               |               |               |                |                |                |                |                |                |                |                |                |                |                |                |
| Cell No.                                                | Rotational Speed | Reaction Time | {1}<br>64.000 | {2}<br>77.800 | {3}<br>86.850 | {4}<br>91.850 | {5}<br>94.550 | {6}<br>95.850 | {7}<br>96.850 | {8}<br>73.350 | {9}<br>83.900 | {10}<br>91.350 | {11}<br>94.700 | {12}<br>96.950 | {13}<br>97.950 | {14}<br>98.300 | {15}<br>73.550 | {16}<br>83.350 | {17}<br>91.150 | {18}<br>95.000 | {19}<br>96.850 | {20}<br>97.750 | {21}<br>98.300 |
| 1                                                       | 3000             | 5             |               | 0.000190      | 0.000190      | 0.000190      | 0.000190      | 0.000190      | 0.000190      | 0.000209      | 0.000190      | 0.000190       | 0.000190       | 0.000190       | 0.000190       | 0.000190       | 0.000202       | 0.000190       | 0.000190       | 0.000190       | 0.000190       | 0.000190       |                |
| 2                                                       | 3000             | 15            | 0.000190      |               | 0.000224      | 0.000190      | 0.000190      | 0.000190      | 0.000190      | 0.125783      | 0.008494      | 0.000190       | 0.000190       | 0.000190       | 0.000190       | 0.000190       | 0.167971       | 0.021634       | 0.000190       | 0.000190       | 0.000190       | 0.000190       |                |
| 3                                                       | 3000             | 30            | 0.000190      | 0.000224      |               | 0.053659      | 0.000663      | 0.000228      | 0.000195      | 0.000190      | 0.694671      | 0.116786       | 0.000545       | 0.000194       | 0.000191       | 0.000190       | 0.428413       | 0.156406       | 0.000393       | 0.000195       | 0.000191       | 0.000190       |                |
| 4                                                       | 3000             | 45            | 0.000190      | 0.000190      | 0.053659      |               | 0.806563      | 0.236097      | 0.053659      | 0.000190      | 0.000485      | 1.000000       | 0.741494       | 0.045645       | 0.008494       | 0.004675       | 0.000190       | 0.000296       | 1.000000       | 0.596744       | 0.053659       | 0.011952       |                |
| 5                                                       | 3000             | 60            | 0.000190      | 0.000190      | 0.000663      | 0.806563      |               | 0.999886      | 0.933939      | 0.000190      | 0.000191      | 0.572014       | 1.000000       | 0.909310       | 0.474655       | 0.323148       | 0.000190       | 0.000191       | 0.474655       | 1.000000       | 0.933939       | 0.572014       |                |
| 6                                                       | 3000             | 75            | 0.000190      | 0.000190      | 0.000228      | 0.236097      | 0.999886      |               | 0.999998      | 0.000190      | 0.000190      | 0.116786       | 0.999981       | 0.968927       | 0.895136       | 0.000190       | 0.000190       | 0.086191       | 1.000000       | 0.999998       | 0.987972       | 0.895136       |                |
| 7                                                       | 3000             | 90            | 0.000190      | 0.000190      | 0.000195      | 0.053659      | 0.933939      | 0.999998      |               | 0.000190      | 0.000190      | 0.023531       | 0.961855       | 1.000000       | 0.999991       | 0.999492       | 0.000190       | 0.000190       | 0.016793       | 0.990855       | 1.000000       | 0.999492       |                |
| 8                                                       | 4000             | 5             | 0.000209      | 0.125783      | 0.000190      | 0.000190      | 0.000190      | 0.000190      | 0.000190      |               | 0.000192      | 0.000190       | 0.000190       | 0.000190       | 0.000190       | 0.000190       | 1.000000       | 0.000195       | 0.000190       | 0.000190       | 0.000190       | 0.000190       |                |
| 9                                                       | 4000             | 15            | 0.000190      | 0.008494      | 0.694671      | 0.000485      | 0.000191      | 0.000190      | 0.000190      | 0.000192      |               | 0.000937       | 0.000191       | 0.000190       | 0.000190       | 0.000190       | 0.000192       | 1.000000       | 0.001262       | 0.000191       | 0.000190       | 0.000190       |                |
| 10                                                      | 4000             | 30            | 0.000190      | 0.000190      | 0.116786      | 1.000000      | 0.572014      | 0.116786      | 0.023531      | 0.000190      | 0.000937      |                | 0.498471       | 0.019886       | 0.003632       | 0.002039       | 0.000190       | 0.000459       | 1.000000       | 0.363158       | 0.023531       | 0.005088       |                |
| 11                                                      | 4000             | 45            | 0.000190      | 0.000190      | 0.000545      | 0.741494      | 1.000000      | 0.999981      | 0.961855      | 0.000190      | 0.000191      | 0.498471       |                | 0.944412       | 0.547395       | 0.384214       | 0.000190       | 0.000191       | 0.406114       | 1.000000       | 0.961855       | 0.646124       |                |
| 12                                                      | 4000             | 60            | 0.000190      | 0.000190      | 0.000194      | 0.045645      | 0.909310      | 0.999991      | 1.000000      | 0.000190      | 0.000190      | 0.019886       | 0.944412       |                | 0.999998       | 0.999807       | 0.000190       | 0.000190       | 0.014171       | 0.984432       | 1.000000       | 0.999807       |                |
| 13                                                      | 4000             | 75            | 0.000190      | 0.000190      | 0.000191      | 0.008494      | 0.474655      | 0.968927      | 0.999991      | 0.000190      | 0.000190      | 0.003632       | 0.547395       | 0.999998       |                | 1.000000       | 0.000190       | 0.000190       | 0.002602       | 0.694671       | 0.999991       | 1.000000       |                |
| 14                                                      | 4000             | 90            | 0.000190      | 0.000190      | 0.000190      | 0.004675      | 0.323148      | 0.895136      | 0.999492      | 0.000190      | 0.000190      | 0.002039       | 0.384214       | 0.999807       | 1.000000       |                | 0.000190       | 0.000190       | 0.001479       | 0.522654       | 0.999492       | 1.000000       |                |
| 15                                                      | 5000             | 5             | 0.000202      | 0.167971      | 0.000190      | 0.000190      | 0.000190      | 0.000190      | 0.000190      | 1.000000      | 0.000192      | 0.000190       | 0.000190       | 0.000190       | 0.000190       | 0.000190       | 0.000190       | 0.000197       | 0.000190       | 0.000190       | 0.000190       | 0.000190       |                |
| 16                                                      | 5000             | 15            | 0.000190      | 0.021634      | 0.428413      | 0.000296      | 0.000191      | 0.000190      | 0.000190      | 0.000195      | 1.000000      | 0.000459       | 0.000191       | 0.000190       | 0.000190       | 0.000190       | 0.000197       |                | 0.000580       | 0.000190       | 0.000190       | 0.000190       |                |
| 17                                                      | 5000             | 30            | 0.000190      | 0.000190      | 0.156406      | 1.000000      | 0.474655      | 0.086191      | 0.016793      | 0.000190      | 0.001262      | 1.000000       | 0.406114       | 0.014171       | 0.002602       | 0.001479       | 0.000190       | 0.000580       |                | 0.286094       | 0.016793       | 0.003632       |                |
| 18                                                      | 5000             | 45            | 0.000190      | 0.000190      | 0.000393      | 0.596744      | 1.000000      | 1.000000      | 0.990855      | 0.000190      | 0.000191      | 0.363158       | 1.000000       | 0.984432       | 0.694671       | 0.522654       | 0.000190       | 0.000190       | 0.286094       |                | 0.990855       | 0.522654       |                |
| 19                                                      | 5000             | 60            | 0.000190      | 0.000190      | 0.000195      | 0.053659      | 0.933939      | 0.999998      | 1.000000      | 0.000190      | 0.000190      | 0.023531       | 0.961855       | 1.000000       | 0.999991       | 0.999492       | 0.000190       | 0.000190       | 0.016793       | 0.990855       |                | 0.999492       |                |
| 20                                                      | 5000             | 75            | 0.000190      | 0.000190      | 0.000191      | 0.011952      | 0.572014      | 0.987972      | 1.000000      | 0.000190      | 0.000190      | 0.005088       | 0.646124       | 1.000000       | 1.000000       | 1.000000       | 0.000190       | 0.000190       | 0.003632       | 0.785699       | 1.000000       | 1.000000       |                |
| 21                                                      | 5000             | 90            | 0.000190      | 0.000190      | 0.000190      | 0.004675      | 0.323148      | 0.895136      | 0.999492      | 0.000190      | 0.000190      | 0.002039       | 0.384214       | 0.999807       | 1.000000       | 1.000000       | 0.000190       | 0.000190       | 0.001479       | 0.522654       | 0.999492       | 1.000000       |                |
